# Supplementary material for: Epidemiology of Rabies in Lesotho: The Importance of Routine Surveillance and Virus Characterization
Source: PubMed Central journal article supplement (PMC6082089; doi:10.3390/tropicalmed2030030), 2017-07-19
Supplement: tropicalmed-02-00030-s001.pdf [file tropicalmed-02-00030-s001.pdf]

## Supplementary Materials: Epidemiology of Rabies in Lesotho: The Importance of Routine Surveillance and Virus Characterization

Andre Coetzer, Jessica Coertse, Mabusetsa Joseph Makalo, Marosi Molomo, Wanda Markotter and Louis Hendrik Nel

**Table S1.** Panel of rabies viruses from Lesotho and neighbouring South African provinces included in the phylogenetic analysis performed in this study.

| Sample Number | Species | Country      | Province/District | Latitude # | Longitude # | Accession number |
|---------------|---------|--------------|-------------------|------------|-------------|------------------|
| ECdog03.05    | Canine  | South Africa | Eastern Cape      | 31.572065  | 28.80546    | DQ841412         |
| ECdog03.751   | Canine  | South Africa | Eastern Cape      | 31.74376   | 28.68927    | DQ841420         |
| ECdog03.779   | Canine  | South Africa | Eastern Cape      | 31.68712   | 28.04197    | DQ841421         |
| ECdog03.936   | Canine  | South Africa | Eastern Cape      | 32.3323496 | 28.1446262  | DQ841422         |
| 448/04        | Canine  | South Africa | Eastern Cape      | 31.5532798 | 26.5550876  | EU163315         |
| ECdog04.25    | Canine  | South Africa | Eastern Cape      | 31.6066561 | 28.8101537  | DQ841405         |
| ECdog04.111   | Canine  | South Africa | Eastern Cape      | 32.4298987 | 28.3593437  | DQ841409         |
| ECdog04.376   | Canine  | South Africa | Eastern Cape      | 30.524964  | 27.3645855  | DQ841414         |
| ECdog04.377   | Canine  | South Africa | Eastern Cape      | 31.2084178 | 28.2351192  | DQ841416         |
| ECdog04.499   | Canine  | South Africa | Eastern Cape      | 30.9690742 | 27.5906715  | DQ841417         |
| 13/05         | Canine  | South Africa | Eastern Cape      | 31.6066839 | 28.7780987  | DQ431253         |
| 126/05        | Human   | South Africa | Eastern Cape      | 32.2190338 | 27.9541894  | GQ918295         |
| 125/07        | Human   | South Africa | Eastern Cape      | 31.6727543 | 27.9834738  | GQ918293         |

|             |        |              |              |                 |                 |          |
|-------------|--------|--------------|--------------|-----------------|-----------------|----------|
| 228/07      | Human  | South Africa | Eastern Cape | 31.60668<br>39  | 28.778098<br>7  | GQ983417 |
| ECdog14/340 | Canine | South Africa | Eastern Cape | 31.66666<br>667 | 28.05           | MF197277 |
| ECbov14/362 | Bovine | South Africa | Eastern Cape | 31.53333<br>333 | 27.683333<br>33 | MF197278 |
| ECdog14/377 | Canine | South Africa | Eastern Cape | -32             | 27.883333<br>33 | MF197279 |
| ECdog14/392 | Canine | South Africa | Eastern Cape | -31.65          | 28.716666<br>67 | MF197280 |
| ECbov14/400 | Bovine | South Africa | Eastern Cape | 31.51666<br>667 | 27.683333<br>33 | MF197281 |
| ECdog14/430 | Canine | South Africa | Eastern Cape | 31.08333<br>333 | 30.216666<br>67 | MF197282 |
| ECdog15/474 | Canine | South Africa | Eastern Cape | 31.38055<br>556 | 28.747222<br>22 | MF197283 |
| ECdog16/318 | Canine | South Africa | Eastern Cape | 31.41111<br>111 | 28.938888<br>89 | MF197284 |
| ECdog16/338 | Canine | South Africa | Eastern Cape | 31.61666<br>667 | 28.638888<br>89 | MF197285 |
| ECbov16/343 | Bovine | South Africa | Eastern Cape | 31.69722<br>222 | 27.905555<br>56 | MF197286 |
| 53/02       | Canine | South Africa | Free State   | 29.18603<br>52  | 27.443892<br>4  | EU163343 |
| 544/02      | Canine | South Africa | Free State   | 28.90933<br>65  | 27.555454<br>7  | EU163298 |
| 648/02      | Canine | South Africa | Free State   | 30.29493<br>47  | 27.097059<br>6  | EU163364 |
| 687/02      | Canine | South Africa | Free State   | 29.72938<br>19  | 27.020559<br>4  | EU163352 |
| 03/03       | Canine | South Africa | Free State   | 30.20155<br>61  | 26.525594<br>6  | EU163310 |
| 238/03      | Canine | South Africa | Free State   | 30.29493<br>47  | 27.097059<br>6  | EU163312 |

|        |        |              |                   |                |                |          |
|--------|--------|--------------|-------------------|----------------|----------------|----------|
| 467/03 | Canine | South Africa | Free State        | 30.20155<br>61 | 26.525594<br>6 | EU163350 |
| 591/03 | Canine | South Africa | Free State        | 29.18603<br>52 | 27.443892<br>4 | EU163353 |
| 902/03 | Canine | South Africa | Free State        | 28.87778<br>87 | 27.866307<br>5 | EU163332 |
| 922/03 | Canine | South Africa | Free State        | 29.08521<br>4  | 26.159576<br>1 | EU163333 |
| 941/03 | Canine | South Africa | Free State        | 28.87778<br>87 | 27.866307<br>5 | EU163338 |
| 21/04  | Canine | South Africa | Free State        | 28.61545<br>94 | 28.200027<br>7 | EU163329 |
| 106/04 | Canine | South Africa | Free State        | 29.72938<br>19 | 27.020559<br>4 | EU163319 |
| 419/04 | Canine | South Africa | Free State        | 29.18603<br>52 | 27.443892<br>4 | EU163314 |
| 551/04 | Canine | South Africa | Free State        | 29.72938<br>19 | 27.020559<br>4 | EU163317 |
| 589/04 | Canine | South Africa | Free State        | 29.72938<br>19 | 27.020559<br>4 | EU163377 |
| 594/04 | Canine | South Africa | Free State        | 29.72938<br>19 | 27.020559<br>4 | EU163316 |
| 56/06  | Canine | South Africa | Free State        | 28.87778<br>87 | 27.866307<br>5 | EU163360 |
| 164/06 | Canine | South Africa | Free State        | 29.18603<br>52 | 27.443892<br>4 | EU163361 |
| 425/06 | Canine | South Africa | Free State        | 29.18603<br>52 | 27.443892<br>4 | EU163356 |
| 790/06 | Canine | South Africa | Free State        | 28.24230<br>25 | 28.311126<br>2 | EU163383 |
| 159/07 | Canine | South Africa | Free State        | 28.90933<br>65 | 27.555454<br>7 | EU163379 |
| 10/261 | Canine | South Africa | KwaZulu-<br>Natal | -28.62         | 29.83          | KC660228 |

|                 |         |              |                |              |             |          |
|-----------------|---------|--------------|----------------|--------------|-------------|----------|
| 10/370          | Canine  | South Africa | KwaZulu-Natal  | -28.52       | 30.08       | KC660165 |
| 10/385          | Canine  | South Africa | KwaZulu-Natal  | -28.32       | 30.1        | KC660262 |
| 10/420          | Canine  | South Africa | KwaZulu-Natal  | -28          | 30          | KC660195 |
| 10/447          | Bovine  | South Africa | KwaZulu-Natal  | -28.6        | 29.94       | KC660181 |
| 10/600          | Canine  | South Africa | KwaZulu-Natal  | -28.6        | 29.42       | KC660276 |
| 11/121          | Canine  | South Africa | KwaZulu-Natal  | -28.8        | 30.03       | KC660210 |
| 11/209          | Bovine  | South Africa | KwaZulu-Natal  | -28.22       | 30          | KC660206 |
| 11/252          | Bovine  | South Africa | KwaZulu-Natal  | -27.55       | 29.92       | KC660220 |
| 11/296          | Canine  | South Africa | KwaZulu-Natal  | -27.7        | 29.92       | KC660268 |
| KZNdog12/394    | Canine  | South Africa | KwaZulu-Natal  | -28.85       | 29.25       | KY681361 |
| KZNjackal12/680 | Jackal  | South Africa | KwaZulu-Natal  | -28.7        | 29.53333333 | KY681374 |
| KZNbov12/592    | Bovine  | South Africa | KwaZulu-Natal  | -28.8        | 29.36666667 | KY681369 |
| KZNcap12/526    | Caprine | South Africa | KwaZulu-Natal  | -28.85       | 29.36666667 | KY681362 |
| KZNbov12/831    | Bovine  | South Africa | KwaZulu-Natal  | -28.93333333 | 29.56666667 | KY681364 |
| KZNjackal12/830 | Jackal  | South Africa | KwaZulu-Natal  | -28.68333333 | 28.98333333 | KY681371 |
| KZNjackal12/621 | Jackal  | South Africa | KwaZulu-Natal  | -28.76666667 | 29.36666667 | KY681373 |
| KZNjackal12/616 | Jackal  | South Africa | KwaZulu-Natal  | -28.8        | 29.45       | KY681365 |
| KZNdog12/407    | Canine  | South Africa | KwaZulu-Natal  | -28.7        | 29.16666667 | KY681366 |
| KZNdog12/730    | Canine  | South Africa | KwaZulu-Natal  | -28.6        | 29.6        | KY681367 |
| 403/01          | Canine  | Lesotho      | Moehale's Hoek | 30.1425917   | 27.4673845  | EU163386 |
| 404/01          | Canine  | Lesotho      | Moehale's Hoek | 30.1425917   | 27.4673845  | EU163385 |
| 430/01          | Canine  | Lesotho      | Moehale's Hoek | 30.1425917   | 27.4673845  | EU163392 |

|                   |         |         |             |                |                |          |
|-------------------|---------|---------|-------------|----------------|----------------|----------|
| 527/01            | Canine  | Lesotho | Quthing     | 30.32464<br>96 | 28.018608<br>7 | EU163395 |
| 531/02            | Canine  | Lesotho | Maseru      | 29.36321<br>88 | 27.514360<br>3 | EU163391 |
| 785/03            | Canine  | Lesotho | Maseru      | 29.36321<br>88 | 27.514360<br>3 | EU163394 |
| 298/05            | Canine  | Lesotho | Maseru      | 29.36321<br>88 | 27.514360<br>3 | EU163393 |
| 301/05            | Canine  | Lesotho | Maseru      | 29.36321<br>88 | 27.514360<br>3 | EU163397 |
| 391/06            | Canine  | Lesotho | Maseru      | 29.36321<br>88 | 27.514360<br>3 | EU163398 |
| 953/06            | Canine  | Lesotho | Maseru      | 29.36321<br>88 | 27.514360<br>3 | EU163396 |
| 383/07            | Canine  | Lesotho | Maseru      | 29.36321<br>88 | 27.514360<br>3 | EU163399 |
| 384/07            | Canine  | Lesotho | Maseru      | 29.36321<br>88 | 27.514360<br>3 | EU163400 |
| 385/07            | Canine  | Lesotho | Maseru      | 29.36321<br>88 | 27.514360<br>3 | EU163401 |
| LESbov201/12<br>* | Bovine  | Lesotho | Maseru      | 29.36321<br>88 | 27.514360<br>3 | MF197287 |
| LEScap190/12<br>* | Caprine | Lesotho | Maseru      | 29.36321<br>88 | 27.514360<br>3 | MF197287 |
| LESdog151/1<br>2* | Canine  | Lesotho | Quthing     | 30.40156<br>87 | 27.708013<br>3 | MF197287 |
| LESbov145/12<br>* | Bovine  | Lesotho | Maseru      | 29.36321<br>88 | 27.514360<br>3 | MF197290 |
| LESbov136/12<br>* | Bovine  | Lesotho | Maseru      | 29.36321<br>88 | 27.514360<br>3 | MF197291 |
| LESunk137/1<br>3* | Unknown | Lesotho | Qacha's Nek | 29.99201<br>47 | 28.357152<br>3 | MF197295 |
| LESdog136/1<br>3* | Canine  | Lesotho | Maseru      | 29.36321<br>88 | 27.514360<br>3 | MF197287 |

|                                      |                   |              |                 |                |                |          |
|--------------------------------------|-------------------|--------------|-----------------|----------------|----------------|----------|
| LESbov07/13*                         | Bovine            | Lesotho      | Mokhotlong      | 29.32432<br>63 | 28.989249<br>4 | MF197287 |
| LESunk164/1<br>3*                    | Unknown           | Lesotho      | Maseru          | 29.36321<br>88 | 27.514360<br>3 | MF197287 |
| LESdog99/14*                         | Canine            | Lesotho      | Qacha's Nek     | 30.28340<br>2  | 27.866682      | MF197296 |
| LESbov60/14*                         | Bovine            | Lesotho      | Maseru          | 29.36321<br>88 | 27.514360<br>3 | MF197297 |
| LESbov08/14*                         | Bovine            | Lesotho      | Maseru          | 29.36321<br>88 | 27.514360<br>3 | MF197298 |
| LESbov195/14<br>*                    | Bovine            | Lesotho      | Berea           | 30.22712<br>75 | 27.505553<br>2 | MF197299 |
| LESbov13/14*                         | Bovine            | Lesotho      | Maseru          | 29.36321<br>88 | 27.514360<br>3 | MF197300 |
| LESbov45a/14<br>*                    | Bovine            | Lesotho      | Maseru          | 29.36321<br>88 | 27.514360<br>3 | MF197301 |
| LESbov45b/1<br>4*                    | Bovine            | Lesotho      | Maseru          | 29.36321<br>88 | 27.514360<br>3 | MF197302 |
| LESbov21/15*                         | Bovine            | Lesotho      | Maseru          | 29.36321<br>88 | 27.514360<br>3 | MF197303 |
| LESdog24/15*                         | Canine            | Lesotho      | Maseru          | 29.36321<br>88 | 27.514360<br>3 | MF197304 |
| LESdog17/15*                         | Canine            | Lesotho      | Maseru          | 29.36321<br>88 | 27.514360<br>3 | MF197305 |
| LESovi30/15*                         | Ovine             | Lesotho      | Maseru          | 29.36321<br>88 | 27.514360<br>3 | MF197306 |
| LESbov22/16*                         | Bovine            | Lesotho      | Maseru          | 29.36321<br>88 | 27.514360<br>3 | MF197307 |
| 05/71<br>(Phylogenetic<br>tree root) | Bat-<br>eared fox | South Africa | Western<br>Cape | 31.63912<br>18 | 18.528507<br>2 | DQ431385 |

\* Denotes the samples that formed part of the sample cohort sequenced in this study.

# Approximate global positioning system (GPS) coordinates were used if the exact location of sampling was unknown.
